# Supplementary material
Source: publisher figshare collection journal article supplement (https://tandf.figshare.com/ndownloader/files/14771126)
Supplement: Supplementary file 1 [file 14771126]

**Appendix 1** Details on extraction of information from Clean Development Mechanism afforestation/reforestation project design documents

**Species table** (Appendix 2)

**Species name**

Only project design documents (PDD) entries with binomial information (i.e., genus plus species) were compiled.

**Number of occurrences as exotic/indigenous across PDDs**

The number of times a species was exotic or indigenous to the country of the PDD. For those PDDs that provided this information, assignments were taken at face value unless obviously incorrect. If information on origin was not provided in PDDs, species were first checked against the open-access online Agroforestree Database (AFTD - Orwa et al., 2009), which contains information on origins among other data. If information was not present in PDDs or the AFTD, searches of other web databases were undertaken to assign origin.

**Total number of occurrences across PDDs**

The sum of exotic and indigenous occurrences as defined above.

**PDD summary table** (Table 3)

**General project information**

The code assigned by us to each project and the country location. The key (project names) for our project codes is provided in Appendix 3.

**Species data: total number, number exotic, number indigenous**

The total number of species mentioned in each PDD and data on the origin of each species (origin determined as above). ‘Sp.’ or other unclear non-binomial references to a taxon/taxa were counted as a single species. In most such cases, assignment of origin was generally clear (for genera with known disjunct origins from the PDD country), but occasionally difficult (if some members of a genus occur naturally in a project country and others do not). In the few such cases, designation was based on the species that appeared most likely to be used.

**Species data: mean suppliers TSSD, exotic and indigenous**

The total number of suppliers of germplasm (seed, clones, etc.) listed in the open-access online Tree Seed Supplier Directory (TSSD - World Agroforestry Centre, 2016) was recorded for each species and then a mean value calculated for exotic and indigenous groups. Taxa with ‘sp.’ references or other designations that could not be related directly to the TSSD were generally excluded from compilation (reducing the denominator accordingly when calculating mean values across species), unless a taxon was the sole representative of an origin category (in which case it was given a ‘typical’ value for the number of suppliers for a species in the concerned genus).

**Germplasm sourcing and delivery data: mention of quality attributes**

Across all species of the PDD, reference to any germplasm quality attributes, e.g., terms such as ‘locally-adapted’, ‘high-performing’, ‘certified quality’:

- Information presented in Table 3 as a short text summary.
- NS = **no specific** information on quality found in the PDD text.

**Germplasm sourcing and delivery data: sourcing strategy**

Across all species of the PDD, a summary of the source or sources of the germplasm for planting in the project:

- ES = seed, clones, etc., **externally sourced** by the project from tree seed centres and/or other local, national and international non-commercial or commercial tree germplasm suppliers. These suppliers may originally have obtained material from natural stands, seed orchards, field trials and farmland, or other sources.
- PSC = **project self-collection**, which may include from forests (relevant for indigenous species), plantations and farm trees (these two sources relevant for both exotic and indigenous species), and other sources. Collection could be of seed, wildings (natural regenerants in forest or farmland) or even clones (the last for some exotics, but also possibly for some high value indigenous fruit trees). Collection may be undertaken with the assistance of the local community involved in the project.
- Other = any **other** specified source, e.g., purchase of seedlings for project planting directly from nurseries (rather than through supplying germplasm to nurseries for the production of planting material for the project).
- NS = **no specified** germplasm source or sources in the PDD text.

A single PDD can have a combination of sources, since different species may be sourced differently and/or different sources of individual species may be combined.

**Germplasm sourcing and delivery data: delivery strategy**

Across all species of the PDD, indications of the mechanism or mechanisms by which planters will receive germplasm for field establishment:

- EN = seedlings raised in **existing nurseries**, in place at the start of the project. If known to be run by the local **community**, e.g., local farmers, villagers, etc., then = EN-C, if not run by the local community or involvement not known then = EN-O.
- PN = seedlings raised in **project nurseries**, set up specifically by the project to serve project planting needs. If known to involve the local **community**, then = PN-C, if not involving the local community or involvement not known then = PN-O.
- Other = any **other** specified means of delivering planting material, e.g., direct seed sowing in the field.
- NS = **no specified** delivery method is the PDD text.

A single PDD can have a combination of delivery strategies, since various species may be delivered differently and/or different delivery strategies may be applied to individual species.

**Appendix 2** A list of all species binomials mentioned across 38 Clean Development Mechanism afforestation/reforestation project design documents (PDDs) (‘species table’). Species are listed in alphabetic order. The number of occurrences of each species across PDDs and information on origin (whether the species is exotic [E] or indigenous [I] to the country of the PDD) is given (NB: not all synonyms or misspellings in PDDs have been reconciled; occasionally, cited groups of possible species were treated as individual entries; some taxa were lost in compilation because binomials were not provided in PDDs)

|  |  |  | |  |  |  |  | |  |
| --- | --- | --- | --- | --- | --- | --- | --- | --- | --- |
|  | **Occurrences** | | | |  | **Occurrences** | | | |
|  |  | |  |  |  |  | |  |  |
|  |  | |  |  |  |  | |  |  |
| **Species name** | **E** | | **I** | **Total** | **Species name** (cont.) | **E** | | **I** | **Total** |
|  |  | |  |  |  |  | |  |  |
|  |  | |  |  |  |  | |  |  |
| *Acacia abyssinica* | 0 | | 1 | 1 | *Juglans regia* | 1 | | 1 | 2 |
| *Acacia auriculiformis* | 2 | | 0 | 2 | *Juniperus procera* | 0 | | 3 | 3 |
| *Acacia catechu* | 0 | | 1 | 1 | *Lafoensia pacari* | 0 | | 1 | 1 |
| *Acacia crassicarpa* | 1 | | 0 | 1 | *Larix gmelinii* | 0 | | 1 | 1 |
| *Acacia mangium* | 3 | | 0 | 3 | *Leucaena leucocephala* | 1 | | 1 | 2 |
| *Acacia melanoxylon* | 1 | | 0 | 1 | *Liquidambar formosana* | 0 | | 2 | 2 |
| *Acacia nilotica* | 0 | | 3 | 3 | *Lithraea molleoides* | 0 | | 1 | 1 |
| *Acacia polyphylla* | 0 | | 1 | 1 | *Lonchocarpus guilleminianus* | 0 | | 1 | 1 |
| *Acacia saligna* | 1 | | 0 | 1 | *Lonchocarpus muehlbergianus* | 0 | | 1 | 1 |
| *Acacia tortilis* | 0 | | 1 | 1 | *Luehea candicans* | 0 | | 1 | 1 |
| *Acrocomia aculeata* | 0 | | 1 | 1 | *Luehea divaricata* | 0 | | 1 | 1 |
| *Aegle marmelos* | 0 | | 1 | 1 | *Mabea fistulifera* | 0 | | 1 | 1 |
| *Aesculus indica* | 0 | | 1 | 1 | *Machaerium aculeatum* | 0 | | 1 | 1 |
| *Agave americana* | 1 | | 0 | 1 | *Machaerium stipitatum* | 0 | | 1 | 1 |
| *Ailanthus altissima* | 0 | | 1 | 1 | *Maclura tinctoria* | 0 | | 1 | 1 |
| *Ailanthus excelsa* | 0 | | 2 | 2 | *Maesopsis eminii* | 0 | | 6 | 6 |
| *Alangium salvifolium* | 0 | | 1 | 1 | *Magnolia officinalis* | 0 | | 1 | 1 |
| *Albizia guachapele* | 0 | | 1 | 1 | *Mangifera indica* | 0 | | 3 | 3 |
| *Albizia gummifera* | 0 | | 1 | 1 | *Markhamia lutea* | 0 | | 3 | 3 |
| *Albizia hasslerii* | 0 | | 1 | 1 | *Mauritia flexuosa* | 0 | | 1 | 1 |
| *Albizia lebbeck* | 0 | | 1 | 1 | *Maytenus ovatus* | 0 | | 1 | 1 |
| *Albizia procera* | 0 | | 1 | 1 | *Melia azadirchta* | 0 | | 1 | 1 |
| *Albizia saman* | 1 | | 0 | 1 | *Millettia drastica* | 0 | | 1 | 1 |
| *Albizia stipulata* | 0 | | 1 | 1 | *Millettia laurentii* | 0 | | 1 | 1 |
| *Alnus acuminata* | 0 | | 1 | 1 | *Morinda tinctoria*/*citrifolia* | 0 | | 1 | 1 |
| *Alnus nepalensis* | 0 | | 1 | 1 | *Moringa stenopetela* | 0 | | 1 | 1 |
| *Alnus nitida* | 0 | | 1 | 1 | *Morus alba* | 1 | | 1 | 2 |
| *Aloe abyssinica* | 0 | | 1 | 1 | *Mucuna pruriens* | 1 | | 0 | 1 |
| *Alstonia scholaris* | 0 | | 1 | 1 | *Myracrodruon urundeuva* | 0 | | 1 | 1 |
| *Amburana cearensis* | 0 | | 1 | 1 | *Myrcia glabra* | 0 | | 1 | 1 |
| *Anacardium occidentale* | 2 | | 0 | 2 | *Myrciaria trunciflora* | 0 | | 1 | 1 |
| *Anadenanthera colubrina* | 0 | | 1 | 1 | *Myrocarpus frondosus* | 0 | | 1 | 1 |
| *Anadenanthera falcata* | 0 | | 1 | 1 | *Myroxylon peruiferum* | 0 | | 1 | 1 |
| *Anadenanthera macrocarpa* | 0 | | 1 | 1 | *Nectandra megapotamica* | 0 | | 2 | 2 |
| *Aniba perutilis* | 0 | | 1 | 1 | *Olea africana* | 0 | | 1 | 1 |
| *Annona cacans* | 0 | | 1 | 1 | *Olea glandulifera* | 0 | | 1 | 1 |
| *Annona squamosa* | 1 | | 0 | 1 | *Ormosia arborea* | 0 | | 1 | 1 |
| *Apidosperma australe* | 0 | | 1 | 1 | *Pachira quinata* | 0 | | 2 | 2 |
| *Araucaria angustifolia* | 0 | | 1 | 1 | *Parapiptadenia rigida* | 0 | | 2 | 2 |
| *Artocarpus lakoocha* | 0 | | 1 | 1 | *Parkinsonia aculeata* | 1 | | 0 | 1 |
| *Aspidosperma cylindrocarpon* | 0 | | 1 | 1 | *Patagonula americana* | 0 | | 2 | 2 |
| *Aspidosperma macrocarpon* | 0 | | 1 | 1 | *Peltophorum dubium* | 0 | | 2 | 2 |
| *Aspidosperma polyneuron* | 0 | | 1 | 1 | *Pentaclethra eetveldeana* | 0 | | 1 | 1 |
| *Astronium graveolens* | 0 | | 2 | 2 | *Pentaclethra macrophylla* | 0 | | 1 | 1 |
| *Azadirachta indica* | 2 | | 3 | 5 | *Persea americana* | 1 | | 0 | 1 |
| *Bahuinia tomentosa* | 0 | | 1 | 1 | *Peschiera fuchsiaefolia* | 0 | | 1 | 1 |
| *Balfourodendron riedelianum* | 0 | | 1 | 1 | *Phyllanthus emblica* | 0 | | 1 | 1 |
| *Bauhinia longifolia* | 0 | | 1 | 1 | *Phytolacca dodecandera* | 0 | | 1 | 1 |
| *Bauhinia variegata* | 0 | | 1 | 1 | *Picea asperata* | 0 | | 1 | 1 |
| *Betula albo-sinensis* | 0 | | 1 | 1 | *Pinus caribaea* | 7 | | 0 | 7 |
| *Betula luminifera* | 0 | | 2 | 2 | *Pinus elliotti* | 1 | | 0 | 1 |
| *Bixa orellana* | 0 | | 1 | 1 | *Pinus massoniana* | 0 | | 3 | 3 |
| *Bombacopsis quinata* | 0 | | 2 | 2 | *Pinus oocarpa* | 1 | | 0 | 1 |
| *Bombax ceiba* | 0 | | 2 | 2 | *Pinus patula* | 2 | | 0 | 2 |
| *Butea monosperma* | 0 | | 1 | 1 | *Pinus radiata* | 2 | | 0 | 2 |
| *Cabralea canjerana* | 0 | | 2 | 2 | *Pinus roxburghii* | 0 | | 1 | 1 |
| *Caesalpinia echinata* | 0 | | 1 | 1 | *Pinus tabulaeformis* | 0 | | 1 | 1 |
| *Calophyllum brasiliense* | 0 | | 1 | 1 | *Pinus taeda* | 1 | | 0 | 1 |
| *Campomanesia xanthocarpa* | 0 | | 1 | 1 | *Pinus tecunumanii* | 2 | | 0 | 2 |
| *Capparis scabrida* | 0 | | 1 | 1 | *Pinus wallichiana* | 0 | | 1 | 1 |
| *Cariniana estrellensis* | 0 | | 1 | 1 | *Piptadenia gonoacantha* | 0 | | 1 | 1 |
| *Cariniana legalis* | 0 | | 1 | 1 | *Plathymenia reticulata* | 0 | | 1 | 1 |
| *Cariniana pyriformis* | 0 | | 1 | 1 | *Platycladus orientalis* | 0 | | 1 | 1 |
| *Carissa edulis* | 0 | | 1 | 1 | *Platymiscium pleistotachium* | 0 | | 1 | 1 |
| *Caryocar brasiliense* | 0 | | 1 | 1 | *Platypodium elegans* | 0 | | 1 | 1 |
| *Casearia gossypiosperma* | 0 | | 1 | 1 | *Podocarpus falcatus* | 0 | | 1 | 1 |
| *Cassia grandis* | 0 | | 1 | 1 | *Podocarpus oleifolius* | 0 | | 1 | 1 |
| *Cassia seamea* | 0 | | 1 | 1 | *Poecilanthe parviflora* | 0 | | 1 | 1 |
| *Casuarina cunninghamiana* | 1 | | 0 | 1 | *Pongamia pinnata* | 0 | | 3 | 3 |
| *Casuarina equisetifolia* | 2 | | 1 | 3 | *Poplus szechuanica* | 0 | | 1 | 1 |
| *Cecropia hololeuca* | 0 | | 1 | 1 | *Populus ciliata*/*alba*/*deltoids* | 0 | | 1 | 1 |
| *Cecropia pachystachya* | 0 | | 1 | 1 | *Pouteria ramiflora* | 0 | | 1 | 1 |
| *Cedrela fissilis* | 0 | | 3 | 3 | *Pouteria sapota* | 1 | | 0 | 1 |
| *Cedrela montana* | 0 | | 1 | 1 | *Pouteria torta* | 0 | | 1 | 1 |
| *Cedrela odorata* | 1 | | 1 | 2 | *Prosopis cineraria* | 0 | | 1 | 1 |
| *Cedrus deodara* | 0 | | 1 | 1 | *Prosopis pallida* | 0 | | 1 | 1 |
| *Ceiba pentandra* | 0 | | 3 | 3 | *Protium heptaphyllum* | 0 | | 1 | 1 |
| *Centrolobium tomentosum* | 0 | | 2 | 2 | *Prunus africana* | 0 | | 9 | 9 |
| *Choerospondias axillaris* | 0 | | 1 | 1 | *Prunus armeniaca* | 0 | | 1 | 1 |
| *Chorisia speciosa* | 0 | | 1 | 1 | *Prunus cornuta*/*cerassoides*/*padus* | 0 | | 1 | 1 |
| *Chrysophyllum gonocarpum* | 0 | | 1 | 1 | *Prunus dulcis* | 1 | | 0 | 1 |
| *Cinnamomum tamala* | 0 | | 1 | 1 | *Psidium guajava* | 2 | | 1 | 3 |
| *Cinnamomum tejpata* | 0 | | 1 | 1 | *Psidium myrtoides* | 0 | | 1 | 1 |
| *Citrus limonum* | 0 | | 1 | 1 | *Pterigota brasiliensis* | 0 | | 1 | 1 |
| *Citrus medica* | 1 | | 0 | 1 | *Pterocarpus santalinus* | 0 | | 1 | 1 |
| *Cleistopholis glauca* | 0 | | 1 | 1 | *Pterocarpus violaceus* | 0 | | 1 | 1 |
| *Cocos nucifera* | 0 | | 1 | 1 | *Pterogyne nitens* | 0 | | 2 | 2 |
| *Coffea arabica* | 1 | | 0 | 1 | *Punica granatum* | 0 | | 1 | 1 |
| *Colubrina elaeocarpus* | 0 | | 1 | 1 | *Quercus acutissima* | 0 | | 1 | 1 |
| *Colubrina glandulosa* | 0 | | 1 | 1 | *Quercus griffithii* | 0 | | 1 | 1 |
| *Copaifera lansdorffii* | 0 | | 1 | 1 | *Quercus humboldtii* | 0 | | 1 | 1 |
| *Cordia africana* | 0 | | 4 | 4 | *Quercus leucotrichophora* | 0 | | 1 | 1 |
| *Cordia alliodora* | 1 | | 1 | 2 | *Quillaja saponaria* | 0 | | 1 | 1 |
| *Cordia ecalyculata* | 0 | | 1 | 1 | *Rapanea guianensis* | 0 | | 1 | 1 |
| *Cordia lutea* | 0 | | 1 | 1 | *Rauvolfia sellowii* | 0 | | 1 | 1 |
| *Cordia trichotoma* | 0 | | 2 | 2 | *Rhizophora mangle* | 0 | | 1 | 1 |
| *Crescentia cujete* | 0 | | 1 | 1 | *Rhodognaphalon brevicuspe* | 0 | | 1 | 1 |
| *Crotolaria anchnocarpoides* (?) | 0 | | 1 | 1 | *Ricinus communis* | 1 | | 0 | 1 |
| *Croton floribundus* | 0 | | 1 | 1 | *Robinia pseudoacacia* | 1 | | 1 | 2 |
| *Croton macrocarpus* | 0 | | 3 | 3 | *Rolinia mucosa* | 0 | | 1 | 1 |
| *Croton macrostachyus* | 0 | | 1 | 1 | *Rosa abyssinica* | 0 | | 1 | 1 |
| *Croton urucurana* | 0 | | 1 | 1 | *Rubus apetalus* | 0 | | 1 | 1 |
| *Cunninghamia lanceolata* | 0 | | 3 | 3 | *Ruprechtia laxiflora* | 0 | | 1 | 1 |
| *Cupressus chengiana* | 0 | | 1 | 1 | *Salix alba* | 0 | | 1 | 1 |
| *Cupressus lusitanica* | 1 | | 0 | 1 | *Samanea saman* | 0 | | 1 | 1 |
| *Cytharexyllum myrianthum* | 0 | | 1 | 1 | *Santalum album* | 0 | | 1 | 1 |
| *Dacryodes edulis* | 0 | | 1 | 1 | *Sapindus mukorossii* | 0 | | 1 | 1 |
| *Dalbergia nigra* | 0 | | 1 | 1 | *Scheelea phalerata* | 0 | | 1 | 1 |
| *Dalbergia retusa* | 0 | | 1 | 1 | *Schima superba* | 0 | | 1 | 1 |
| *Dalbergia sissoo* | 0 | | 2 | 2 | *Schima wallichii* | 0 | | 1 | 1 |
| *Delonix regia* | 1 | | 0 | 1 | *Schinus molle* | 1 | | 0 | 1 |
| *Dialium guineense* | 1 | | 0 | 1 | *Schinus terebinthifolius* | 0 | | 1 | 1 |
| *Diatenopteryx sorbifolia* | 0 | | 1 | 1 | *Schizolobium amazonicum* | 0 | | 1 | 1 |
| *Didymopanax morototonii* | 0 | | 1 | 1 | *Schizolobium parahyba* | 0 | | 2 | 2 |
| *Dilodendron bipinnatum* | 0 | | 1 | 1 | *Senna macranthera* | 0 | | 1 | 1 |
| *Diospyros inconstans* | 0 | | 1 | 1 | *Senna multijuga* | 0 | | 1 | 1 |
| *Dipteryx alata* | 0 | | 1 | 1 | *Sesbania grandiflora* | 0 | | 1 | 1 |
| *Dipteryx panamensis* | 0 | | 1 | 1 | *Simarouba versicolor* | 0 | | 1 | 1 |
| *Duguetia lanceolata* | 0 | | 1 | 1 | *Spondias lutea* | 0 | | 1 | 1 |
| *Emblica officinalis* | 0 | | 1 | 1 | *Spondias mombin* | 1 | | 0 | 1 |
| *Enterolobium contortisiliquum* | 0 | | 2 | 2 | *Stryphnodendron purpureum* | 0 | | 1 | 1 |
| *Erythrina mulungu* | 0 | | 1 | 1 | *Swartzia jorori* | 0 | | 1 | 1 |
| *Erythrina brucei* | 0 | | 1 | 1 | *Swietenia macrophylla* | 0 | | 3 | 3 |
| *Erythrina crista-galli* | 0 | | 1 | 1 | *Syagrus oleracea* | 0 | | 1 | 1 |
| *Esenbeckia leiocarpa* | 0 | | 1 | 1 | *Syagrus romanzoffiana* | 0 | | 1 | 1 |
| *Eucalyptus alba* | 1 | | 0 | 1 | *Syzygium cumini* | 0 | | 3 | 3 |
| *Eucalyptus brassiana* | 1 | | 0 | 1 | *Syzygium guineesense* | 0 | | 1 | 1 |
| *Eucalyptus camaldulensis* | 6 | | 0 | 6 | *Tabebuia avellanedae* | 0 | | 1 | 1 |
| *Eucalyptus citriodora* | 1 | | 0 | 1 | *Tabebuia chrysotricha* | 0 | | 1 | 1 |
| *Eucalyptus cloeziana* | 1 | | 0 | 1 | *Tabebuia dura* | 0 | | 1 | 1 |
| *Eucalyptus deglupta* | 1 | | 0 | 1 | *Tabebuia heptaphylla* | 0 | | 2 | 2 |
| *Eucalyptus dunnii* | 1 | | 0 | 1 | *Tabebuia impetiginosa* | 0 | | 1 | 1 |
| *Eucalyptus globulus* | 2 | | 0 | 2 | *Tabebuia ochracea* | 0 | | 2 | 2 |
| *Eucalyptus grandis* | 8 | | 0 | 8 | *Tabebuia pulcherrima* | 0 | | 1 | 1 |
| *Eucalyptus maculata* | 1 | | 0 | 1 | *Tabebuia rosea* | 0 | | 3 | 3 |
| *Eucalyptus pellita* | 1 | | 0 | 1 | *Tabebuia roseo-alba* | 0 | | 1 | 1 |
| *Eucalyptus resinifera* | 1 | | 0 | 1 | *Tabebuia vellosoi* | 0 | | 1 | 1 |
| *Eucalyptus saligna* | 1 | | 0 | 1 | *Taiwania flous* | 0 | | 1 | 1 |
| *Eucalyptus tereticornis* | 5 | | 0 | 5 | *Talisia esculenta* | 0 | | 1 | 1 |
| *Eucalyptus torelliana* | 1 | | 0 | 1 | *Tamarindus indica* | 1 | | 1 | 2 |
| *Eucalyptus urophylla* x *grandis* | 2 | | 0 | 2 | *Tapirira guianensis* | 0 | | 1 | 1 |
| *Eucalyptus urophylla* | 2 | | 0 | 2 | *Tectona grandis* | 7 | | 2 | 9 |
| *Eugenia pyriformis* | 0 | | 1 | 1 | *Terminalia amazonica* | 0 | | 1 | 1 |
| *Eugenia tomentosa* | 0 | | 1 | 1 | *Terminalia argentea* | 0 | | 1 | 1 |
| *Eugenia uniflora* | 0 | | 1 | 1 | *Terminalia arjuna* | 0 | | 1 | 1 |
| *Euphorbia abyssinica* | 0 | | 1 | 1 | *Terminalia bellerica* | 0 | | 1 | 1 |
| *Euphorbia candelabrum* | 0 | | 1 | 1 | *Terminalia brasiliensis* | 0 | | 1 | 1 |
| *Euphorbia scoparia* | 0 | | 1 | 1 | *Terminalia chebula* | 0 | | 1 | 1 |
| *Euphorbia tirucalli* | 1 | | 1 | 2 | *Terminalia oblonga* | 0 | | 1 | 1 |
| *Ficus guaranitica* | 0 | | 1 | 1 | *Terminalia superba* | 0 | | 1 | 1 |
| *Fraxinus chinensis* | 1 | | 0 | 1 | *Terminalia tomentosa* | 0 | | 1 | 1 |
| *Gallesia integrifolia* | 0 | | 1 | 1 | *Theobroma cacao* | 1 | | 0 | 1 |
| *Genipa americana* | 0 | | 1 | 1 | *Theobroma grandiflorum* | 1 | | 0 | 1 |
| *Glircidia sepium* | 1 | | 0 | 1 | *Thespesia populnea* | 0 | | 1 | 1 |
| *Gmelina arborea* | 3 | | 0 | 3 | *Tibouchina granulosa* | 0 | | 1 | 1 |
| *Grevillea robusta* | 4 | | 0 | 4 | *Toona ciliata* | 0 | | 2 | 2 |
| *Grewia optiva*/*oppositifolia* | 0 | | 1 | 1 | *Treculia africana* | 0 | | 1 | 1 |
| *Guarea guidonia* | 0 | | 1 | 1 | *Trema micrantha* | 0 | | 1 | 1 |
| *Guarea rusbyi* | 0 | | 1 | 1 | *Trichilia hirta* | 0 | | 1 | 1 |
| *Guazuma ulmifolia* | 0 | | 2 | 2 | *Triplaris brasiliana* | 0 | | 1 | 1 |
| *Hagenia abyssinica* | 0 | | 1 | 1 | *Ulmus laevigata*/*wallichiana* | 0 | | 1 | 1 |
| *Helietta apiculata* | 0 | | 1 | 1 | *Vernonia amygadalina* | 0 | | 1 | 1 |
| *Hevea brasiliensis* | 1 | | 0 | 1 | *Virola koschnyi* | 0 | | 1 | 1 |
| *Hibiscus rosa* | 1 | | 0 | 1 | *Virola peruviano* | 0 | | 1 | 1 |
| *Hicoria carya* | 0 | | 1 | 1 | *Virola sebifera* | 0 | | 2 | 2 |
| *Holocalyx balansae* | 0 | | 1 | 1 | *Vitex doniana* | 1 | | 0 | 1 |
| *Hyeronyma alchorneoides* | 0 | | 1 | 1 | *Vitex keniensis* | 0 | | 3 | 3 |
| *Hymenaea courbaril* | 0 | | 3 | 3 | *Vitex montevidensis* | 0 | | 1 | 1 |
| *Hymenaea stigonocarpa* | 0 | | 1 | 1 | *Vochysia guatemalensis* | 0 | | 1 | 1 |
| *Hymenaea stilbocarpa* | 0 | | 1 | 1 | *Zanthoxylum rhoifolium* | 0 | | 1 | 1 |
| *Inga laurina* | 0 | | 1 | 1 | *Zanthoxylum riedelianum* | 0 | | 1 | 1 |
| *Inga uruguensis* | 0 | | 2 | 2 | *Zeyheria tuberculosa* | 0 | | 1 | 1 |
| *Irvingia gabonensis* | 0 | | 1 | 1 | *Ziziphus mauritiana* | 0 | | 1 | 1 |
| *Jacaranda cuspidifolia* | 0 | | 1 | 1 | *Ziziphus jujuba* | 1 | | 0 | 1 |
| *Jacaranda micantha* | 0 | | 1 | 1 |  |  | |  |  |
| *Jacaratia spinosa* | 0 | | 1 | 1 | **Grand total occur.** | **115** | | **368** | **483** |
| *Joannesia princeps* | 0 | | 1 | 1 | **Grand total species** | **69** | | **295** | **352** |
| *Juglans neotropica* | 0 | | 1 | 1 | **No. occur./no. species** | **1.7** | | **1.2** | **1.4** |
|  |  | |  |  |  |  | |  |  |

**Appendix 3** Key for 38 Clean Development Mechanism afforestation/reforestation project design documents, as applied in Table 3

|  |  |
| --- | --- |
| **Code** | **Project Design Document title** (original project document) |
|  |  |
|  |  |
| 1 | Reforestation of grazing Lands in Santo Domingo, Argentina |
| 2 | Carbon Sequestration through Reforestation in the Bolivian Tropics by Smallholders of “The Federación De Comunidades Agropecuarias De Rurrenabaque (FECAR)" |
| 3 | AES Tietê Afforestation/Reforestation Project in the State of São Paulo, Brazil |
| 4 | Reforestation as Renewable Source of Wood Supplies for Industrial Use in Brazil |
| 5 | Nerquihue Small-Scale CDM Afforestation Project using Mycorrhizal Inoculation in Chile |
| 6 | Securitization and Carbon Sinks Project |
| 7 | Afforestation and Reforestation on Degraded Lands in Northwest Sichuan, China |
| 8 | Facilitating Reforestation for Guangxi Watershed Management in Pearl River Basin |
| 9 | Reforestation on Degraded Lands in Northwest Guangxi |
| 10 | Argos CO2 Offset Project, through reforestation activities for commercial use |
| 11 | Commercial reforestation on lands dedicated to extensive cattle grazing activities in the region of Magdalena Bajo Seco |
| 12 | Forestry Project for the Basin of the Chinchiná River, an Environmental and Productive Alternative for the City and the Region |
| 13 | Forestry Project in Strategic Ecological Areas of the Colombian Caribbean Savannas |
| 14 | Reforestation of degraded/degrading land in the Caribbean Savannah of Colombia |
| 15 | Ibi Batéké degraded savannah afforestation project for fuel wood production (Democratic Republic of Congo) |
| 16 | Humbo Ethiopia Assisted Natural Regeneration Project |
| 17 | Bagepalli CDM Reforestation Programme |
| 18 | Improving Rural Livelihoods Through Carbon Sequestration By Adopting Environment Friendly Technology based Agroforestry Practices |
| 19 | India: Himachal Pradesh Reforestation Project – Improving Livelihoods and Watersheds |
| 20 | Reforestation of degraded land by MTPL in India |
| 21 | Reforestation of severely degraded landmass in Khammam District of Andhra Pradesh, India under ITC Social Forestry Project |
| 22 | Small Scale Cooperative Afforestation CDM Pilot Project Activity on Private Lands Affected by Shifting Sand Dunes in Sirsa, Haryana |
| 23 | The International Small Group and Tree Planting Program (TIST), Tamil Nadu, India |
| 24 | Aberdare Range / Mt. Kenya Small Scale Reforestation Initiative. Kirimara-Kithithina Small Scale A/R Project |
| 25 | Aberdare Range/ Mt. Kenya Small Scale Reforestation Initiative. Kamae-Kipipiri Small Scale A/R Project |
| 26 | Aberdare Range/ Mt. Kenya Small Scale Reforestation Initiative. Kibaranyeki Small Scale A/R Project |
| 27 | Southern Nicaragua CDM Reforestation Project |
| 28 | Reforestation of croplands and grasslands in low income communities of Paraguarí Department, Paraguay |
| 29 | Reforestation, sustainable production and carbon sequestration project in José Ignacio Távara´s dry forest, Piura, Peru |
| 30 | Oceanium mangrove restoration project |
| 31 | Kachung Forest Project: Afforestation on Degraded Lands |
| 32 | Uganda Nile Basin Reforestation Project No 1 |
| 33 | Uganda Nile Basin Reforestation Project No 2 |
| 34 | Uganda Nile Basin Reforestation Project No 3 |
| 35 | Uganda Nile Basin Reforestation Project No 4 |
| 36 | Uganda Nile Basin Reforestation Project No 5 |
| 37 | Posco Uruguay' afforestation on degraded extensive grazing land |
| 38 | Cao Phong Reforestation Project |
|  |  |
